# Supplementary material for: Functional characterisation of two Δ12-desaturases demonstrates targeted production of linoleic acid as pheromone precursor inNasonia
Source: Oxford University Press journal article supplement (doi:10.1242/jeb.201038), 2019-01-01
Supplement: jeb201038supp.pdf [file jeb201038supp.pdf]

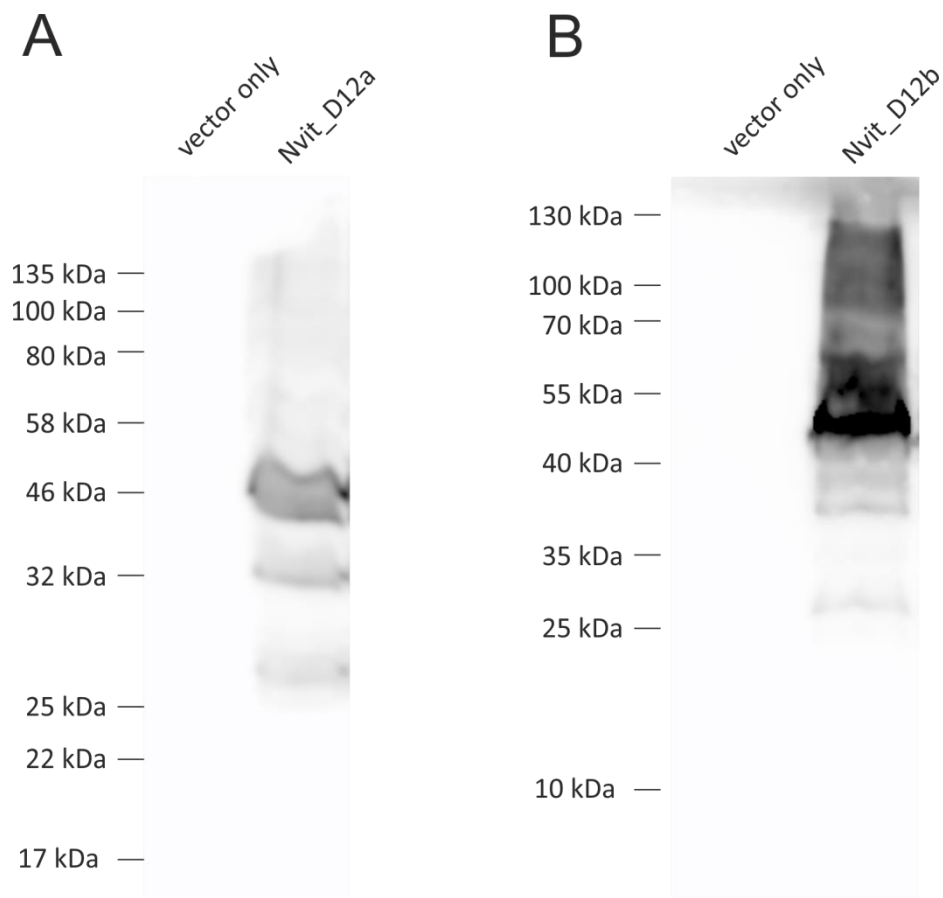

**Fig. S1. Western blot analysis of transformed *S. cerevisiae* cells.** Protein extracts of (A) Nvit\_D12a ( $M_w = 46610$  Da) and (B) Nvit\_D12b ( $M_w = 465247$  Da) and empty vector controls were separated on 13% SDS-PAGE gels and blotted on PVDF membranes. (FLAG)<sub>3</sub>-tagged proteins were visualised by chemiluminescence.

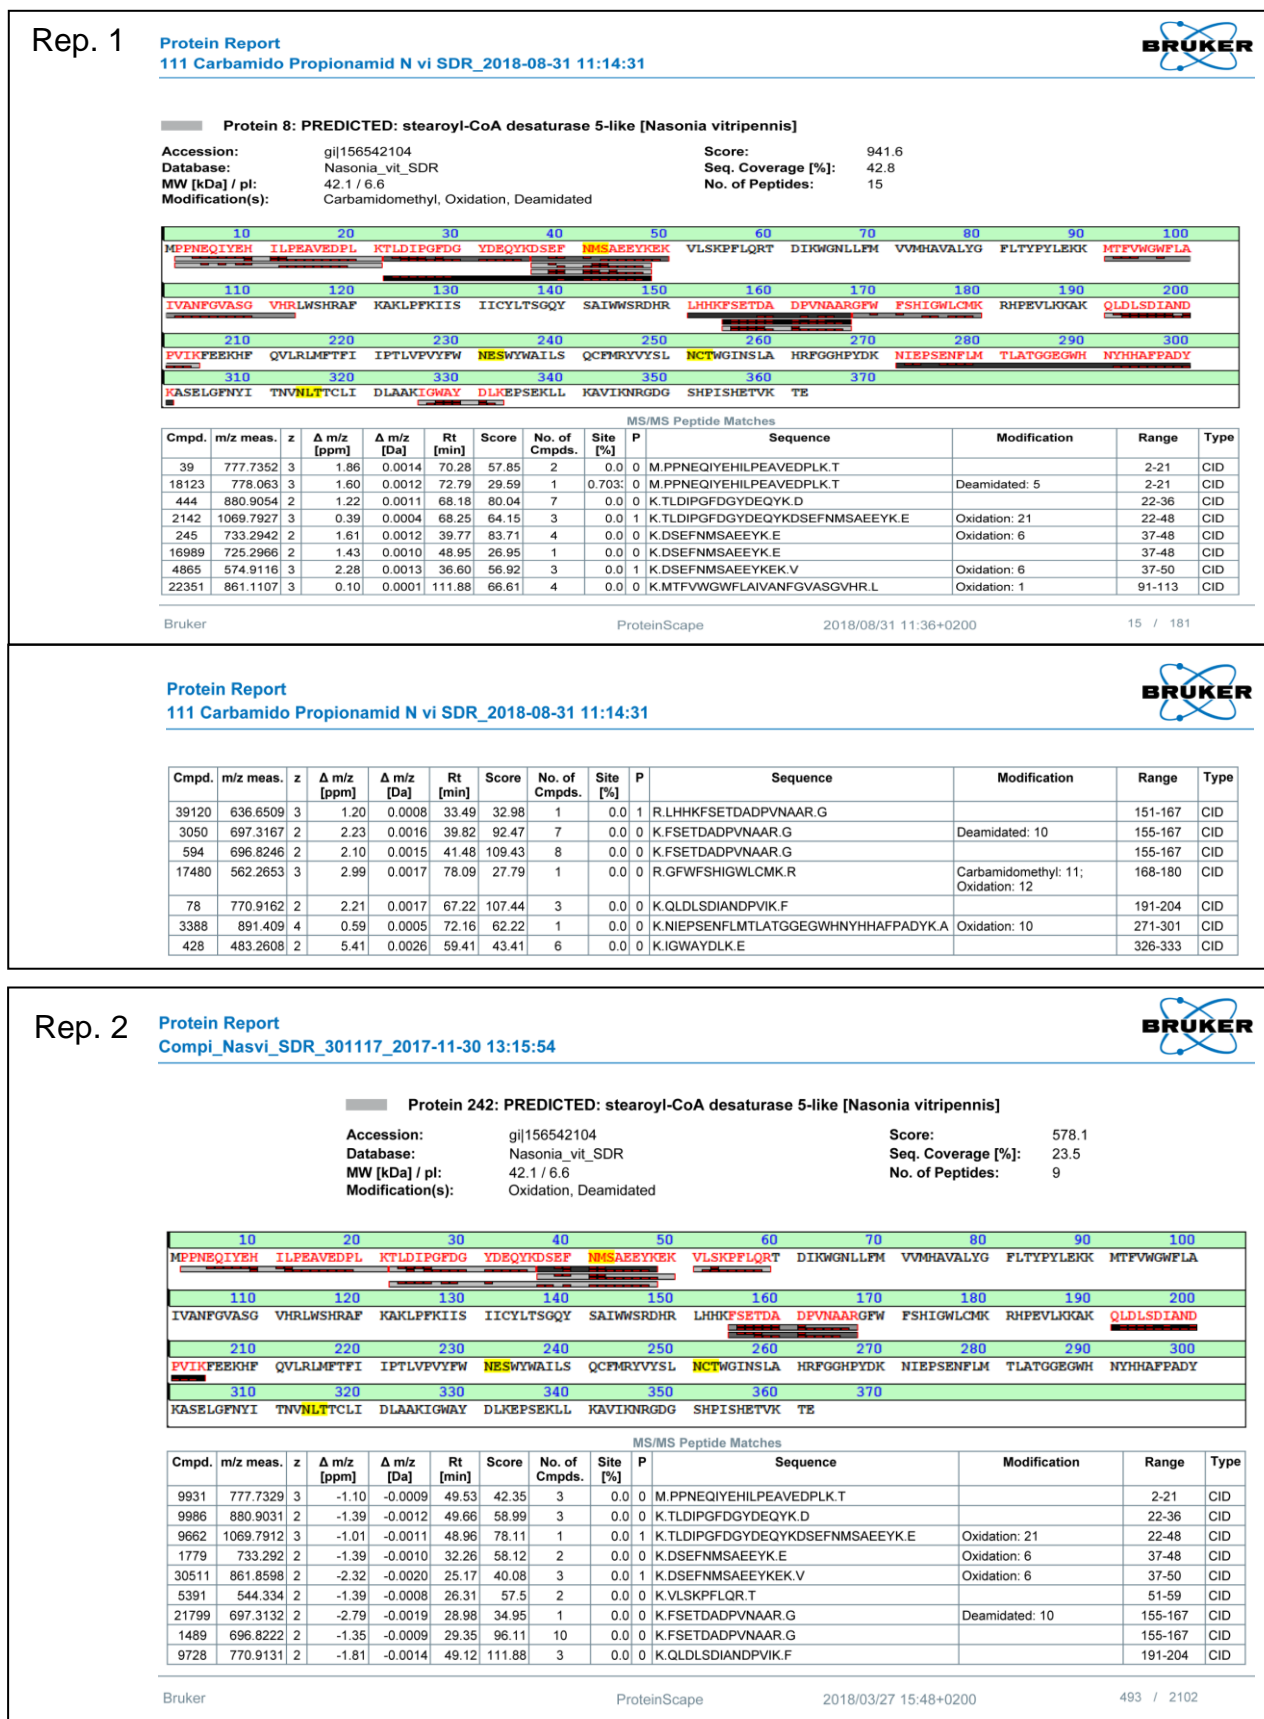

**Fig. S2. Results the two replicates (Rep. 1 and Rep. 2) of the mass spectrometric analysis of the Δ12-desaturase Nvit\_D12a in the rectal vesicles of male *N. vitripennis*.** Ten rectal vesicles of 1–2 day old wasps were pooled per replicate and subjected to SDS-PAGE. *In-gel* trypsin digested proteins were analysed by LC/MS/MS. Protein database searching of the resulting mass spectra was performed using the Mascot search engine.

XP\_001599873.1 (unbiased)  
XP\_001599836.1 (male biased)

```
MPPNEQIHEHVLPEAVEDPLKTLDI PGFNDYDEEHKDFNMSAEYNEKVINKPFLQRT
MPPNEQIYEHILPEAVEDPLKTLDI PGFDGYDEQYKDSEFNMSAEYKEKVL SKPFLQRT
*****: ** :*****:*****:*****:*****:*****
DIKWGNLYFMVVLHAIALYGF LTYPYFEKKMTFVWGWF LAIVANFGVAGGVHRLW SHRAF
DIKWGNLLFMVVMHAVALYGF LTYPYLEK KMTFVWGWF LAIVANFGVASGVHRL WSHRAF
***** *****: ** :*****:*****:*****:*****:*****
KAKVPLKII F ILSYLTSGQYS AIWWARDHRIH H K F S E T D A D P V N A A R G F W F S H V G W L C M K
KAKLPFKIISIICYLTSGQYS AIWWSRDH RLH H K F S E T D A D P V N A A R G F W F S H I G W L C M K
***: * :*** * : *****:*****:*****:*****:*****
RHPEVLK KAKQLDLS DI LNDPVIK FEEKHFQVLR LI FAFI IPTLVPVYFWNESWY WAILS
RHPEVLK KAKQLDLS DI ANDPVIK FEEKHFQVLR LMFTFI IPTLVPVYFWNESWY WAILS
***** *****: * :*****:*****:*****:*****
QCFMRYAYSLNCTWGIN SFAHMF GNHPYDKHIEPAENFIMTLATGGEGWHNYHHVFPADY
QCFMRYVYSLNCTWGIN SLAHRFGGHPYD KNI EPSENFLMTLATGGEGWHNYHHAFPADY
***** . *****: ** ** . *****:***:***:*****:***** . *****
KASELGFNYITNVNLT TCLIDLAAK IGWAYDLKE PSEKLLKAVIKNRGDGSHPISHEPVK
KASELGFNYITNVNLT TCLIDLAAK IGWAYDLKEPSEKLLKAVIKNRGDGSHPISHETVK
***** *****: **
TK
TE
*:
```

**Fig. S3. Sequence alignment of the two  $\Delta 12$ -desaturases Nvit\_D12a (XP\_001599836.1) and Nvit\_D12b (XP\_001599873.1) from *N. vitripennis*.** Sequences detected in the male pheromone gland (rectal vesicle) by LC/MS/MS are indicated in colour (yellow: ranges covered by unique peptides of the male-biased desaturase Nvit\_D12a; green: peptides shared by both  $\Delta 12$ -desaturases).

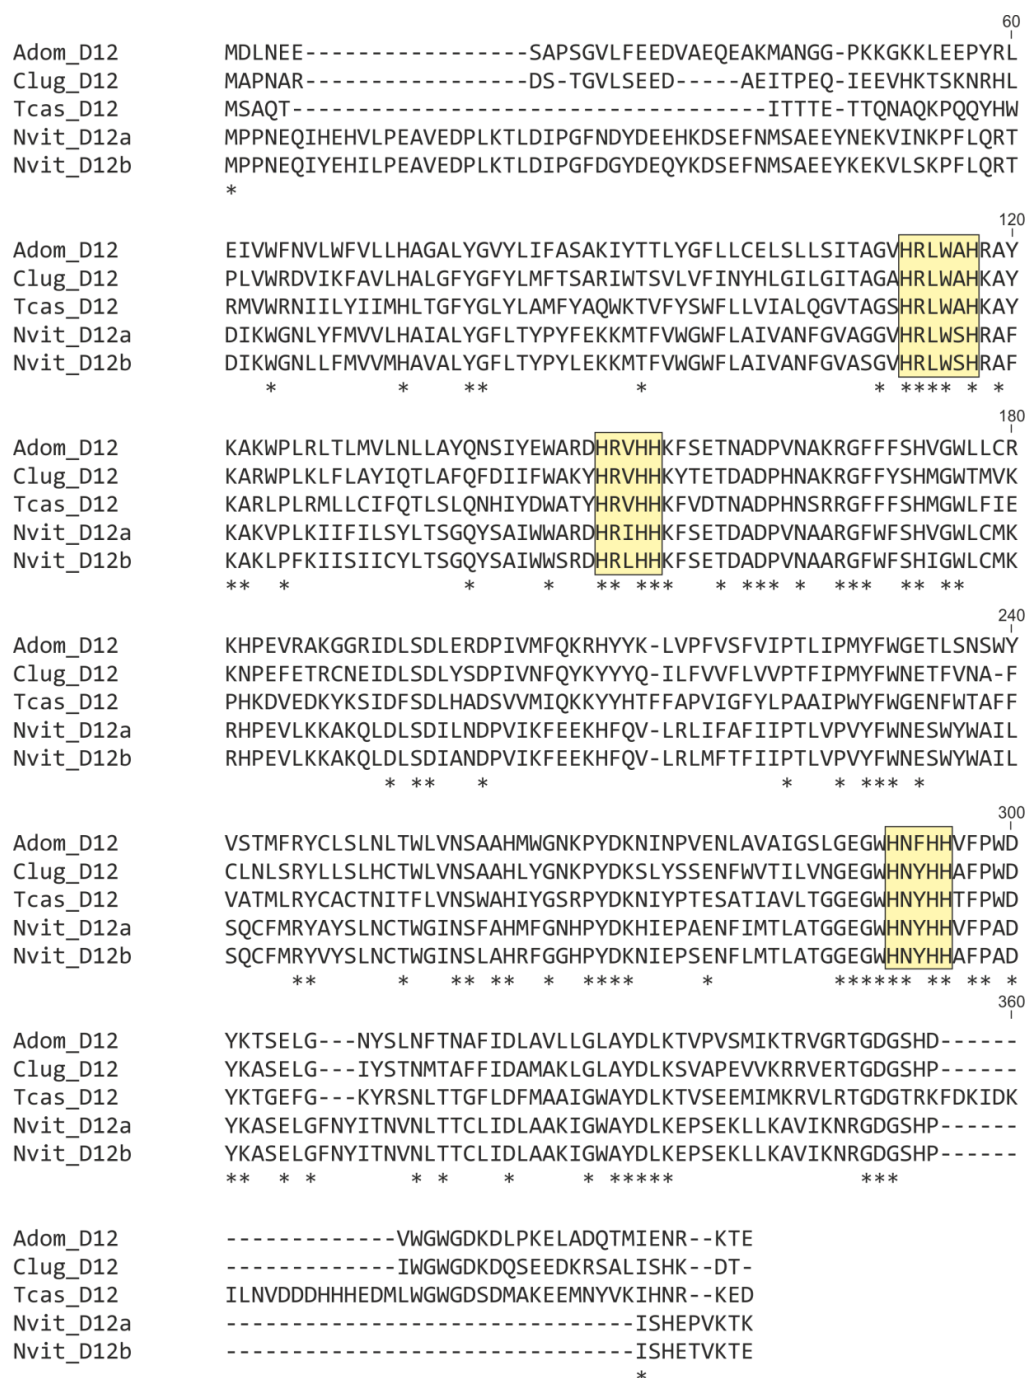

**Fig. S4. Multiple sequence alignment of functionally characterised insect  $\Delta 12$ -desaturases.** The three histidine boxes characteristic for “First” type desaturases (Hashimoto et al., 2008) are shown in yellow frames. Conserved amino acids are indicated by asterisks at the bottom of each column. Sequences identities and similarities are given in Table S3. Adom\_D12 = *Acheta domesticus* (Zhou et al., 2008), Clug\_D12 = *Chauliognathus lugubris* (Haritos et al., 2012), Tcas\_D12 = *Tribolium castaneum* (Zhou et al., 2008), Nvit\_D12a/b = *Nasonia vitripennis* (this study).

**Table S1. Nucleotide and amino acid sequences of Nvit\_D12a (XP\_001599836.1) and Nvit\_D12b (XP\_001599873.1).** The nucleotide sequences were optimised for expression in *S. cerevisiae*. Recognition sites for *Bsal* are underlined and restriction sites are bold.

---

Nucleotide sequences

---

**Nvit\_D12a (XP\_001599836.1)**

5'AAAAAAGGTCTC**CATG**CCACCAAACGAACAAATCCATGAACATGTTTTGCCAGAAGCTGTT  
GAGGATCCATTGAAAACTTTGGATATTCCAGGTTTCAACGACTACGATGAAGAACATAAGGAC  
TCCGAATTC AACATGTCTGCTGAAGAGTACAACGAAAAGGTTATCAACAAGCCATTCTTGCAA  
AGAACC GATATTAAGTGGGGTAACTTGTACTTCATGGTTGTCTTGCATGCTATTGCCTTGTAC  
GGTTTTT GACTTACCATACTTCGAGAAGAAGATGACTTTTGTGGGGTTGGTTTTTGGCTA  
TCGTTGCTAATTTTGGTGTGCTGGTGGTGTTCATAGATTGTGGTCACATAGAGCTTTTAAGG  
CTAAGTTCCACTGAAGATCATTTTCATCTTGTCTACTTGACCTCCGGTCAATATTCTGCTAT  
TTGGTGGGCTAGAGATCATAGAATCCATCACAAGTTCTCTGAAACTGATGCTGATCCAGTTAA  
TGCTGCTAGAGGTTTTTGGTTTTCTCATGTTGGTTGGTTGTGCATGAAGAGACATCCAGAAGT  
TTTGAAGAAGGCCAAGCAATTGGATTTGTCCGATATTTGAATGACCCCGTCATCAAGTTTGA  
AGAAAAGCACTTCAAGTCCTGAGATTGATTTTCGCCTTCATCATTCCAAC TTTGGTTCCAGTT  
TACTTCTGGAACGAATCTTGGTATTGGGCCATTTTGTCTCAATGCTTTATGAGATACGCCTACT  
CTTTGAACTGTACCTGGGGTATTA ACTCTTTGCTCATATGTTGGTAACCATCCATACGATAA  
GCACATTGAACCAGCCGAAAAC TTCATTATGACTTTGGCTACTGGTGGTGAAGTTGGCATAA  
TTACCATCATGTTTTTCCAGCTGATTACAAGGCTTCTGAATTGGGTTTCAACTACATCACCAAC  
GTTAACTTGACCACCTGTTTGATTGATTTGGCTGCTAAAATTGGTTGGGCCTACGATTTGAAA  
GAACCATCTGAAAAGTTGTTGAAGGCCGTGATTAAGAATAGAGGTGATGGTTCTCATCCAATC  
TCTCATGAACCAGTTAAGACCAAGT**AAGAGAGACCA**AAAAA3'

**Nvit\_D12b (XP\_001599873.1)**

5'AAAAAAGGTCTC**CATG**CCACCAAACGAACAAATCTACGAACATATTTT GCCAGAAGCCGTT  
GAAGATCCATTGAAAAC TTTGGATATTCCAGGTTTCGATGGTTACGATGAACAGTACAAAGAC  
TCCGAATTC AACATGTCTGCTGAAGAGTACAAGAGAAGGTTTTGTCTAAGCCATTCTTGCAA  
AGAACC GATATTAAGTGGGGTAACTTGTGTTTCATGGTTGTTATGCATGCTGTTGCCTTGTAC  
GGTTTTT GACTTATCCATACTTGGAGAAGAAGATGACTTTTGTGGGGTTGGTTTTTGGCTA  
TCGTTGCTAATTTTGGTGTGCTCTGGTGTTCATAGATTGTGGTCACATAGAGCTTTTAAGG  
CTAAGTTGCCATTCAAGATCATCTCCATTATTTGCTACTTGACCTCCGGTCAATATTCTGCTAT  
TTGGTGGTCTAGAGATCACAGATTGCATCACAATTCTCTGAAACTGATGCCGATCCAGTTAA  
TGCTGCTAGAGGTTTTTGGTTCTCTCATATTGGTTGGTTGTGCATGAAGAGACATCCAGAAGT  
TTTGAAGAAGGCCAAGCAATTGGATTTGTCCGATATTGCTAATGACCCAGTCATCAAGTTTGA  
AGAAAAGCACTTCCAAGTCCTGAGATTGATGTTACCTTCATTATCCCAACTTTGGTTCCAGTT  
TACTTCTGGAATGAATCTTGGTACTGGGCCATTTTGTCTCAATGTTTCATGAGATACGTCTACT  
CATTGAACTGTACCTGGGGTATTA ACTCTTTGGCACATAGATTCCGGTGGTTCATCCATACGATA  
AGAACATTGAACCATCCGAGAATTTCTTGATGACATTGGCTACTGGTGGTGAAGTTGGCATA  
ATTATCATCATGCTTTTCCAGCTGACTACAAGGCTTCTGAATTGGGTTTAACTACATCACC  
CGTTAACTTGACCACCTGTTTGATTGATTTGGCTGCTAAAATTGGTTGGGCCTACGATTTGAA  
AGAACCCTCTGAAAAGTTGTTGAAGGCCGTTATTAAGAACAGAGGTGATGGTTCTCATCCAAT  
TTCTCACGAAACTGTTAAGACCGAGT**AAGAGAGACCA**AAAAA 3'

---

---

## Amino acid sequences

---

### **Nvit\_D12a (XP\_001599836.1)**

MPPNEQIHEHVLPEAVEDPLKTLDIPGFDYDEEHKDSEFNMSAEEYNEKVINKPFLQRTDIKWG  
NLYFMVVLHAIALYGFLTYPYFEKKMTFWGWFLAIVANFGVAGGVHRLWSHRAFKAKVPLKIIFIL  
SYLTSGQYSAIWWARDHRIHHKFSETDADPVNAARGFWFSHVGWLCMKRHPEVLKAKQLDLS  
DILNDPVIKFEEKHFQVLRLLIFAFIIPTLVPVYFWNESWYWAILSQCFMRYAYSLNCTWGINSAHM  
FGNHPYDKHIEPAENFIMTLATGGEGWHNYHHVFPADYKASELGFNYITNVNLTCLIDLAAKIGW  
AYDLKEPSEKLLKAVIKNRGDGSHPISEPVKTK\*

### **Nvit\_D12b (XP\_001599873.1)**

MPPNEQIYEHILPEAVEDPLKTLDIPGFDGYDEQYKDSEFNMSAEEYKEKVLKSKPFLQRTDIKWGN  
LLFMVVMHAVALYGFLTYPYLEKKMTFWGWFLAIVANFGVASGVHRLWSHRAFKAKLPFKIISIIC  
YLTSGQYSAIWWSRDHRLHHKFSETDADPVNAARGFWFSHIGWLCMKRHPEVLKAKQLDLSDI  
ANDPVIKFEEKHFQVLRMLMFTFIIPTLVPVYFWNESWYWAILSQCFMRYVYSLNCTWGINSLAHRF  
GGHPYDKNIEPSENFMLTLATGGEGWHNYHHAFFADYKASELGFNYITNVNLTCLIDLAAKIGW  
AYDLKEPSEKLLKAVIKNRGDGSHPISETVKTE\*

---

**Table S2. Conversion of externally supplied fully labelled  $^{13}\text{C}18:1^{\Delta 9}$  into  $^{13}\text{C}18:2^{\Delta 9,12}$  by *Urolepis rufipes*.** Single 2-d-old wasps (n = 12 for each sex) were treated with an acetone solution of  $^{13}\text{C}18:1^{\Delta 9}$ . After 20 h, lipids of 3 homogenised wasps each (resulting in 4 replicates for males and females, respectively) were extracted, transesterified into fatty acid methyl esters, and analysed by GC/MS. The conversion of  $^{13}\text{C}18:1^{\Delta 9}$  to  $^{13}\text{C}18:2^{\Delta 9,12}$  by the wasps was concluded from the occurrence of the diagnostic molecular ion m/z 312 at the retention time of C18:2 $^{\Delta 9,12}$  methyl ester. The conversion rate was calculated by relating the peak area of the  $^{13}\text{C}$ -labelled molecular ion of C18:2 $^{\Delta 9,12}$  methyl ester (m/z 312) to the added peak areas of the  $^{13}\text{C}$ -labelled molecular ions of C18:2 $^{\Delta 9,12}$  methyl ester plus C18:1 $^{\Delta 9}$  methyl ester (m/z 314).

|                     | Female 01 | Female 02 | Female 03 | Female 04 | Male 01 | Male 02 | Male 03 | Male 04 |
|---------------------|-----------|-----------|-----------|-----------|---------|---------|---------|---------|
| Area m/z 312        | 4059      | 14031     | 17465     | 8985      | 0       | 0       | 0       | 0       |
| Area m/z 314        | 34633     | 115906    | 273316    | 43249     | 33488   | 46539   | 23350   | 28169   |
| Conversion rate (%) | 10.49     | 10.80     | 6.01      | 17.20     | 0       | 0       | 0       | 0       |

**Table S3. Sequence identities and similarities between insect-derived  $\Delta 12$ -desaturases.** Number and percentage of identical amino acid positions (sequence identities) are given in the upper right triangle, number and percentage of identical plus similar amino acid positions (sequence similarity) are given in the lower left triangle.

|           | Adom_D12      | Clug_D12      | Tcas_D12      | Nvit_D12a     | Nvit_D12b     |
|-----------|---------------|---------------|---------------|---------------|---------------|
| Adom_D12  |               | 186/357 (52%) | 163/377 (43%) | 159/388 (41%) | 159/383 (42%) |
| Clug_D12  | 244/357 (68%) |               | 157/371 (42%) | 149/381 (39%) | 141/381 (37%) |
| Tcas_D12  | 221/377 (59%) | 225/371 (60%) |               | 131/408 (32%) | 129/398 (32%) |
| Nvit_D12a | 223/388 (58%) | 212/381 (55%) | 189/408 (46%) |               | 327/362 (90%) |
| Nvit_D12b | 220/383 (57%) | 210/381 (55%) | 191/398 (47%) | 346/362 (96%) |               |

### References

**Haritos, V. S., Horne, I., Damcevski, K., Glover, K., Gibb, N., Okada, S. and Hamberg, M.** (2012). The convergent evolution of defensive polyacetylenic fatty acid biosynthesis genes in soldier beetles. *Nat. Commun.* **3**.

**Hashimoto, K., Yoshizawa, A. C., Okuda, S., Kuma, K., Goto, S. and Kanehisa, M.** (2008). The repertoire of desaturases and elongases reveals fatty acid variations in 56 eukaryotic genomes. *J. Lipid. Res.* **49**, 183-191.

**Zhou, X. R., Horne, I., Damcevski, K., Haritos, V., Green, A. and Singh, S.** (2008). Isolation and functional characterization of two independently-evolved fatty acid delta 12-desaturase genes from insects. *Ins. Mol. Biol.* **17**, 667-676.
